# Supplementary material
Source: PubMed Central journal article supplement (PMC3028644)
Supplement: supp_31_4_710__1.pdf [file supp_31_4_710__1.pdf]

## Zheng et al, Supplemental Data

**Fig. S1**

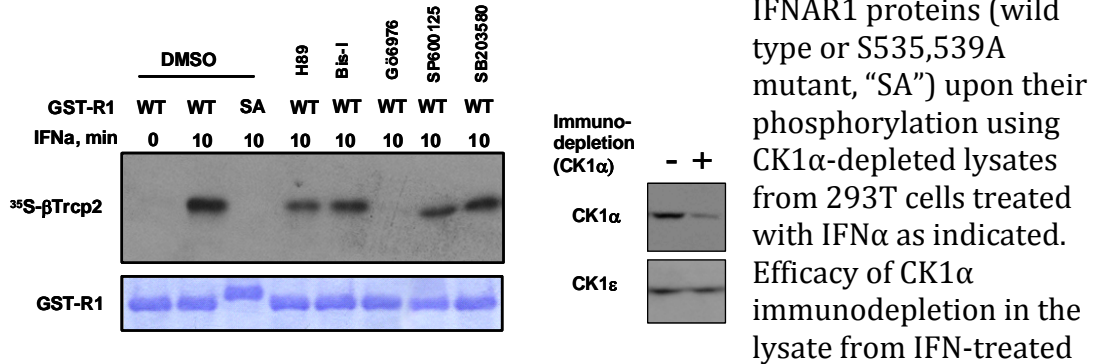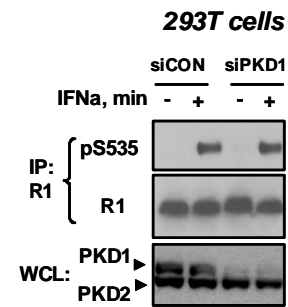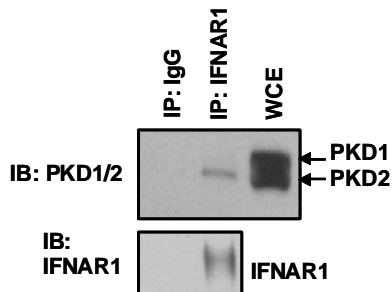

### Supplemental References

1. Liu, J., W. C. HuangFu, K. G. Kumar, J. Qian, J. P. Casey, R. B. Hamanaka, C. Grigoriadou, R. Aldabe, J. A. Diehl, and S. Y. Fuchs. 2009. Virus-induced unfolded protein response attenuates antiviral defenses via phosphorylation-dependent degradation of the type I interferon receptor. *Cell Host Microbe* **5**:72-83.
